# Supplementary material
Source: PubMed Central journal article supplement (PMC7304614)
Supplement: NIHMS1596013-supplement-1.pdf [file NIHMS1596013-supplement-1.pdf]

Older patients with Alzheimer’s-related cortical atrophy who develop post-operative delirium are at increased risk of long-term cognitive decline after surgery

**APPENDIX**

| <b>Appendix Table of Contents</b>                                                                                                                                                                                                                                                 |      |
|-----------------------------------------------------------------------------------------------------------------------------------------------------------------------------------------------------------------------------------------------------------------------------------|------|
|                                                                                                                                                                                                                                                                                   | Page |
| <b>Supplementary Figure 1.</b> Summary of study sample selection                                                                                                                                                                                                                  | 34   |
| <b>Supplementary Figure 2.</b> AD Signature and Aging-Only signature ROIs                                                                                                                                                                                                         | 35   |
| <b>Supplementary Table 1.</b> Cognitive test sample sizes by study timepoint                                                                                                                                                                                                      | 36   |
| <b>Supplementary Table 2.</b> Predicted slopes from months 2-36 for GCP and selected individual neuropsychological tests                                                                                                                                                          | 37   |
| <b>Supplementary Table 3.</b> Sample characteristics of SAGES neuroimaging sub-cohort by AD signature tertile and delirium groups                                                                                                                                                 | 38   |
| <b>Supplementary Table 4.</b> Baseline scores for selected individual neuropsychological tests                                                                                                                                                                                    | 39   |
| <b>Supplementary Table 5.</b> Unstandardized coefficients from linear mixed effects models for associations between AD (or Aging) signature cortical atrophy and/or delirium on post-operative short-term and long-term change                                                    | 40   |
| <b>Supplementary Table 6.</b> Covariate model coefficients for standardized cognitive outcomes (z-scores)                                                                                                                                                                         | 41   |
| <b>Supplementary Table 7.</b> Standardized coefficients from linear mixed effects models for associations between AD (or Aging) signature cortical atrophy and/or delirium on post-operative short-term and long-term change using raw cognitive scores without retest correction | 42   |
| <b>Supplementary Figure 3.</b> Group effects of cortical atrophy due to AD or aging and post-operative delirium on short- and long-term change in cognitive scores without retest correction.                                                                                     | 43   |
| <b>Supplementary Table 8.</b> Comparison of baseline (intercept) coefficients with and without additional health measures as covariates                                                                                                                                           | 44   |

The information below is provided to give further details about our study methods including sample selection (Supplementary Figure 1), ROIs comprising the AD and Aging-Only signatures (Figure 2), sample sizes (Supplementary Table 1), and slopes used to predict effect size

(Supplementary Table 2). This appendix also provides more details on our study results including baseline characteristics by the six AD signature/delirium groups (Supplementary Table 3), baseline neuropsychological test scores (Supplementary Table 4), and unstandardized linear mixed effects (LME) model results (Supplementary Table 5). Finally, this appendix provides the results from supplementary analyses using cognitive scores without retest correction (Supplementary Table 7 and Figure 3) or with additional health measure covariates (Supplementary Table 8).

Supplementary Tables 2 and 8 are based on LME models using maximum likelihood parameter estimation and an unstructured covariance. The models included a random intercept, random time-slope from 2-36 months, fixed time indicator variables for months 1 and 2, a fixed time-slope from 2-36 months, and fixed effects for covariates. Individual slopes were derived by predicting random slope from the LME model. Average predicted slopes by group are reported.

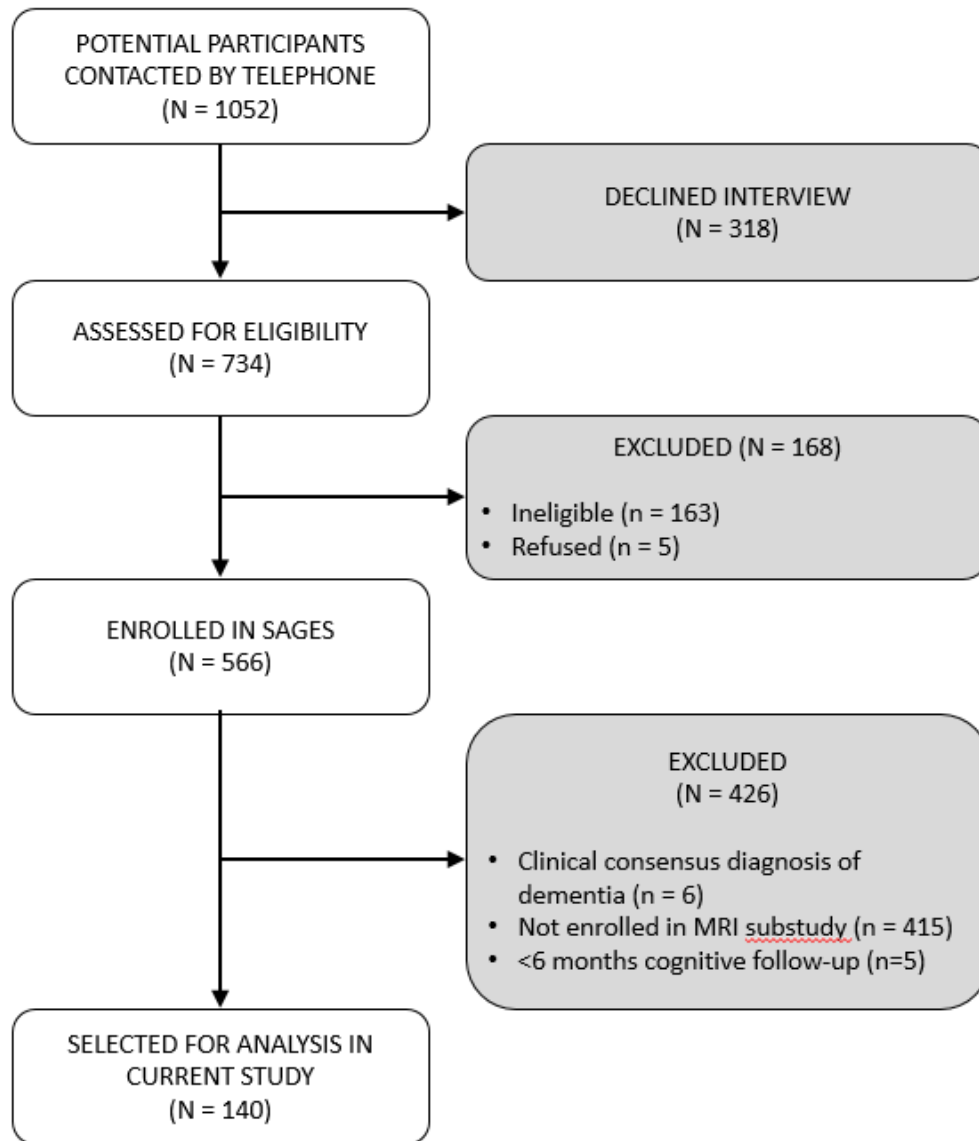

**Supplementary Figure 1. Summary of study sample selection.** Eligible participants were age 70 years and older, English speaking, scheduled to undergo elective surgery with an anticipated length of stay of at least 3 days. Exclusion criteria included evidence of dementia, delirium, hospitalization within 3 months, terminal condition, legal blindness, severe deafness, history of schizophrenia or psychosis, and history of alcohol abuse. Patients who would be out of the catchment area at time of follow-up were also excluded from enrollment. For this study, participants were further excluded if they were not enrolled in the MRI sub-study (i.e. did not undergo baseline MRI) or had less than 6 months of cognitive follow-up.

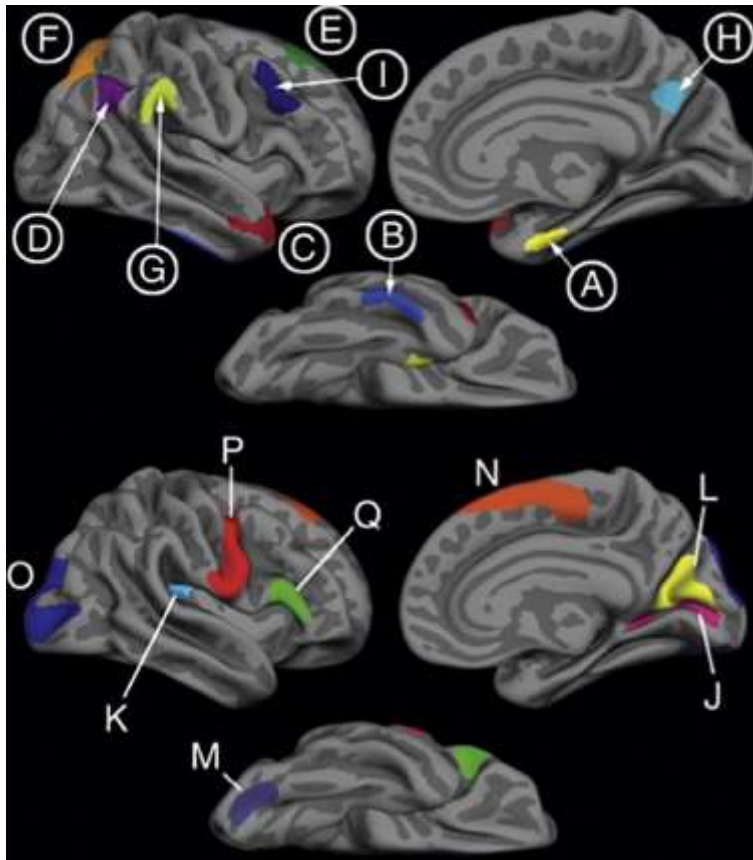

**Supplementary Figure 2. AD signature and Aging-only Signature regions of interest (ROIs)[10].** Top) “AD signature” ROIs. Bottom) “Aging-Only” ROIs, where atrophy is seen primarily in normal aging with minimal additional effects of AD. Key (circled letters denote AD signature ROIs): A: medial temporal, B: inferior temporal, C: temporal pole, D: Angular, E: superior frontal, F: superior parietal, G: supramarginal, H: precuneus, I: middle frontal, J: calcarine, K: caudal insula, L: cuneus, M: caudal fusiform, N: dorsomedial frontal, O: lateral occipital, P: precentral, Q: inferior frontal.

**Supplementary Table 1.** Cognitive test sample sizes by study timepoint

| <b>Timepoint</b> | <b>HVLT total (N)</b> | <b>HVLT delay (N)</b> | <b>Trails B (N)</b> | <b>GCP (N)</b> |
|------------------|-----------------------|-----------------------|---------------------|----------------|
| <b>Baseline</b>  | 140                   | 140                   | 139                 | 140            |
| <b>Month 1</b>   | 140                   | 139                   | 140                 | 140            |
| <b>Month 2</b>   | 139                   | 139                   | 139                 | 139            |
| <b>Month 6</b>   | 140                   | 140                   | 138                 | 140            |
| <b>Month 12</b>  | 135                   | 135                   | 134                 | 135            |
| <b>Month 18</b>  | 134                   | 134                   | 133                 | 134            |
| <b>Month 24</b>  | 129                   | 128                   | 129                 | 129            |
| <b>Month 30</b>  | 84                    | 84                    | 83                  | 84             |
| <b>Month 36</b>  | 121                   | 120                   | 121                 | 121            |

Note: No baseline covariates were missing (age, sex, education)

GCP = General Cognitive Performance

HVLT = Hopkins Verbal Learning Test–Revised

Trails B = Trail Making Test B

**Supplementary Table 2.** Predicted slopes from months 2-36 for GCP and selected individual neuropsychological tests

| <b>Group:</b>                                    | <b>HVLT total</b> | <b>HVLT delay</b> | <b>Trails B</b> | <b>GCP</b>     |
|--------------------------------------------------|-------------------|-------------------|-----------------|----------------|
| <b><u>AD Signature Tertiles</u></b>              |                   |                   |                 |                |
| <b>AD signature Tertile 1</b>                    | 0.060 (0.589)     | 0.040 (0.378)     | 2.189 (4.932)   | 0.142 (0.682)  |
| <b>AD signature Tertile 2</b>                    | -0.043 (0.459)    | 0.026 (0.243)     | 0.015 (8.441)   | -0.032 (0.634) |
| <b>AD signature Tertile 3</b>                    | -0.019 (0.631)    | -0.070 (0.307)    | -2.404 (8.732)  | -0.119 (0.617) |
| <b><u>AD Signature Tertiles and Delirium</u></b> |                   |                   |                 |                |
| <b>AD signature Tertile 1, no delirium</b>       | 0.047 (0.598)     | 0.041 (0.343)     | 2.405 (4.619)   | 0.149 (0.692)  |
| <b>AD signature Tertile 2, no delirium</b>       | -0.006 (0.479)    | 0.048 (0.237)     | -0.446 (8.812)  | -0.057 (0.656) |
| <b>AD signature Tertile 3, no delirium</b>       | 0.112 (0.564)     | -0.034 (0.309)    | -1.654 (7.280)  | -0.007 (0.519) |
| <b>AD signature Tertile 1, delirium</b>          | 0.096 (0.586)     | 0.037 (0.476)     | 1.606 (5.858)   | 0.126 (0.680)  |
| <b>AD signature Tertile 2, delirium</b>          | -0.199 (0.347)    | -0.070 (0.258)    | 1.961 (6.728)   | 0.075 (0.554)  |
| <b>AD signature Tertile 3, delirium</b>          | -0.627 (0.590)    | -0.232 (0.255)    | -5.777 (13.693) | -0.636 (0.800) |

AD signature = Alzheimer's disease signature (average cortical thickness in 9 bilateral cortical regions of interest)

GCP = General Cognitive Performance

HVLT = Hopkins Verbal Learning Test-Revised

Trails B = Trail Making Test B

**Supplementary Table 3.** Sample characteristics of SAGES neuroimaging sub-cohort by AD signature tertile and delirium groups

| <b>AD Signature Tertile</b>                     | <b><u>No Delirium</u></b> |                  |                  | <b><u>Delirium</u></b> |                  |                  |
|-------------------------------------------------|---------------------------|------------------|------------------|------------------------|------------------|------------------|
|                                                 | <b>Tertile 1</b>          | <b>Tertile 2</b> | <b>Tertile 3</b> | <b>Tertile 1</b>       | <b>Tertile 2</b> | <b>Tertile 3</b> |
| <b>N</b>                                        | 35                        | 38               | 37               | 13                     | 9                | 8                |
| <b>Female Sex, n (%)</b>                        | 25 (71%)                  | 19 (50%)         | 20 (54%)         | 10 (77%)               | 6 (67%)          | 5 (62%)          |
| <b>Non-White or Hispanic, n (%)</b>             | 2 (6%)                    | 5 (13%)          | 3 (8%)           | 1 (8%)                 | 1 (11%)          | 0 (0%)           |
| <b>Age at Baseline Assessment, mean (SD)</b>    | 75.9 (4.3)                | 75.6 (4.2)       | 76.4 (5.3)       | 75.3 (4.5)             | 76.5 (4.5)       | 78.8 (3.6)       |
| <b>Education, Years, median (IQR)</b>           | 15 (13, 18)               | 14 (12, 18)      | 14 (13, 18)      | 14 (12, 18)            | 14 (12, 16)      | 14 (13, 16)      |
| <b>Charlson Comorbidity Index, mean (SD)</b>    | 0.66 (0.80)               | 0.92 (1.02)      | 0.86 (1.13)      | 0.62 (0.96)            | 1.44 (1.42)      | 1.00 (0.93)      |
| <b>Baseline GCP, mean (SD)</b>                  | 61.0 (6.5)                | 58.2 (6.5)       | 59.2 (6.8)       | 57.5 (6.1)             | 56.4 (6.2)       | 54.1 (5.7)       |
| <b>Geriatric Depression Scale, median (IQR)</b> | 1 (1, 4)                  | 2 (0, 4)         | 1 (1, 3)         | 1 (0, 3)               | 2 (2, 4)         | 1.5 (.5, 3)      |
| <b>3MS Score, median (IQR)</b>                  | 96 (93, 99)               | 94 (91, 97)      | 96 (91, 99)      | 94 (92, 96)            | 94 (87, 99)      | 89 (85, 93)      |
| <b>Proxy IQCODE, mean (SD)</b>                  | 3.13 (0.24)               | 3.07 (0.13)      | 3.17 (0.18)      | 3.16 (0.16)            | 3.13 (0.47)      | 3.32 (0.46)      |
| <b>Any ADL Impairment, n (%)</b>                | 1 (3%)                    | 3 (8%)           | 3 (8%)           | 2 (15%)                | 0 (0%)           | 1 (12%)          |

3MS = Modified Mini Mental State Exam

ADL = Activities of Daily Living

GCP = General Cognitive Performance

IQCODE = Informant Questionnaire on Cognitive. Decline in the Elderly

SAGES = Successful Aging after Elective Surgery

**Supplementary Table 4.** Baseline scores for selected individual neuropsychological tests

| <b>Group:</b>                                    | <b>HVLT total</b> | <b>HVLT delay</b> | <b>Trails B</b>  | <b>GCP</b>     |
|--------------------------------------------------|-------------------|-------------------|------------------|----------------|
| <b><u>AD Signature Tertiles</u></b>              |                   |                   |                  |                |
| <b>AD signature Tertile 1</b>                    | 22.958 (5.223)    | 7.688 (2.776)     | 232.812 (42.139) | 60.025 (6.528) |
| <b>AD signature Tertile 2</b>                    | 22.426 (5.166)    | 7.511 (2.166)     | 209.723 (56.667) | 57.813 (6.422) |
| <b>AD signature Tertile 3</b>                    | 23.067 (5.742)    | 7.711 (2.944)     | 222.477 (50.585) | 58.322 (6.874) |
| <b><u>AD Signature Tertiles and Delirium</u></b> |                   |                   |                  |                |
| <b>AD signature Tertile 1, no delirium</b>       | 24.000 (4.863)    | 8.200 (2.386)     | 235.914 (43.439) | 60.969 (6.524) |
| <b>AD signature Tertile 2, no delirium</b>       | 22.737 (5.569)    | 7.526 (2.357)     | 214.974 (52.673) | 58.157 (6.498) |
| <b>AD signature Tertile 3, no delirium</b>       | 24.162 (5.490)    | 8.162 (2.833)     | 226.417 (51.064) | 59.236 (6.826) |
| <b>AD signature Tertile 1, delirium</b>          | 20.154 (5.305)    | 6.308 (3.351)     | 224.462 (38.791) | 57.484 (6.062) |
| <b>AD signature Tertile 2, delirium</b>          | 21.111 (2.759)    | 7.444 (1.130)     | 187.556 (70.348) | 56.363 (6.237) |
| <b>AD signature Tertile 3, delirium</b>          | 18.000 (4.071)    | 5.625 (2.669)     | 204.750 (47.352) | 54.094 (5.704) |

AD signature = Alzheimer's disease signature (average cortical thickness in 9 bilateral cortical regions of interest)

GCP = General Cognitive Performance

HVLT = Hopkins Verbal Learning Test–Revised

Trails B = Trail Making Test B



**Supplementary Table 5.** Unstandardized coefficients from linear mixed effects models for associations between AD (or Aging) Signature cortical atrophy and/or Delirium on post-operative short-term and long-term change in General Cognitive Performance (GCP) score

|                                       | <b>Model Coefficients (95% Confidence Interval)</b> |                      |                     |                          |
|---------------------------------------|-----------------------------------------------------|----------------------|---------------------|--------------------------|
|                                       | <b>Baseline</b>                                     | <b>Month 1</b>       | <b>Month 2</b>      | <b>Months 2-36 slope</b> |
| <b>Model 1 – AD Signature</b>         |                                                     |                      |                     |                          |
| AD Signature                          | -0.20 (-1.05, 0.64)                                 | -0.28 (-0.69, 0.14)  | 0.24 (-0.11, 0.59)  | -0.18 (-0.35, -0.01)     |
| <b>Model 2 – AD Signature</b>         |                                                     |                      |                     |                          |
| AD Signature                          | -0.25 (-1.18, 0.67)                                 | -0.24 (-0.70, 0.23)  | 0.14 (-0.26, 0.54)  | -0.12 (-0.31, 0.08)      |
| Delirium                              | -1.75 (-13.26, 9.76)                                | 1.15 (-4.74, 7.05)   | -2.60 (-7.60, 2.39) | 1.53 (-0.78, 3.84)       |
| AD Signature × delirium               | -0.19 (-2.22, 1.83)                                 | -0.25 (-1.29, 0.78)  | 0.51 (-0.36, 1.39)  | -0.31 (-0.72, 0.09)      |
| <b>Model 1 – Aging Only Signature</b> |                                                     |                      |                     |                          |
| Aging-Only Signature                  | -0.94 (-2.02, 0.14)                                 | -0.42 (-0.96, 0.12)  | 0.32 (-0.14, 0.78)  | -0.17 (-0.40, 0.05)      |
| <b>Model 2 – Aging Only Signature</b> |                                                     |                      |                     |                          |
| Aging-Only Signature                  | -0.91 (-2.07, 0.24)                                 | -0.40 (-1.00, 0.20)  | 0.39 (-0.12, 0.90)  | -0.22 (-0.47, 0.03)      |
| Delirium                              | 5.67 (-17.49, 28.83)                                | 1.33 (-10.79, 13.44) | 3.24 (-7.03, 13.52) | -1.91 (-6.76, 2.94)      |
| Aging-Only Signature × delirium       | -1.05 (-3.84, 1.73)                                 | -0.19 (-1.65, 1.26)  | -0.36 (-1.60, 0.88) | 0.21 (-0.38, 0.79)       |

All models included mean-centered covariates for age (years), female sex, and years of education.

Coefficients can be interpreted as the change in GCP score associated with a 0.10 mm (slightly less than 1.5 SD) decrease in cortical thickness in the AD or Aging-Only signature.

**Supplementary Table 6.** Covariate model coefficients for standardized cognitive outcomes (z-scores)

| <b>Covariate Model Coefficients (95% Confidence Interval)</b> |                             |                        |                          |
|---------------------------------------------------------------|-----------------------------|------------------------|--------------------------|
|                                                               | <b>Baseline Age (years)</b> | <b>Female Sex</b>      | <b>Education (years)</b> |
| <b>AD signature</b>                                           |                             |                        |                          |
| <b>GCP Model 1</b>                                            | -0.053 (-0.082, -0.023)     | 0.325 (0.043, 0.607)   | 0.118 (0.067, 0.168)     |
| <b>GCP Model 2</b>                                            | -0.050 (-0.079, -0.021)     | 0.348 (0.071, 0.626)   | 0.112 (0.062, 0.162)     |
| <b>HVLT Total Learning</b>                                    | -0.038 (-0.065, -0.011)     | 0.588 (0.328, 0.848)   | 0.116 (0.070, 0.163)     |
| <b>HVLT Delayed Recall</b>                                    | -0.042 (-0.071, -0.014)     | 0.472 (0.203, 0.741)   | 0.103 (0.054, 0.151)     |
| <b>Trails B</b>                                               | -0.045 (-0.072, -0.018)     | -0.028 (-0.284, 0.228) | 0.078 (0.031, 0.124)     |
| <b>Aging-Only signature</b>                                   |                             |                        |                          |
| <b>GCP Model 1</b>                                            | -0.049 (-0.079, -0.020)     | 0.321 (0.045, 0.596)   | 0.119 (0.069, 0.169)     |
| <b>GCP Model 2</b>                                            | -0.046 (-0.074, -0.017)     | 0.348 (0.080, 0.617)   | 0.115 (0.066, 0.164)     |

Cognitive outcome variables were standardized (i.e. z-scores). Covariates were mean-centered but not standardized; coefficients can be interpreted as the standard deviation difference in the average cognitive outcome z-score given a 1 year increase in baseline age, in females compared to males, or given a 1 year increase in education.

**Supplementary Table 7.** Standardized coefficients from linear mixed effects models for associations between AD (or Aging) signature cortical atrophy and/or delirium on post-operative short-term and long-term change using raw cognitive scores without retest correction

|                                   | <b>Model Coefficients (95% Confidence Interval)</b> |                        |                        |                          |
|-----------------------------------|-----------------------------------------------------|------------------------|------------------------|--------------------------|
|                                   | <b>Baseline</b>                                     | <b>Month 1</b>         | <b>Month 2</b>         | <b>Months 2-36 slope</b> |
| <b>GCP (Model 1)</b>              |                                                     |                        |                        |                          |
| AD Signature                      | -0.035 (-0.179, 0.109)                              | -0.048 (-0.119, 0.023) | 0.041 (-0.020, 0.101)  | -0.030 (-0.059, -0.001)  |
| <b>GCP (Model 2)</b>              |                                                     |                        |                        |                          |
| AD Signature                      | -0.044 (-0.201, 0.114)                              | -0.040 (-0.120, 0.040) | 0.024 (-0.044, 0.092)  | -0.020 (-0.053, 0.013)   |
| Delirium                          | -0.385 (-0.726, -0.045)                             | -0.041 (-0.215, 0.132) | 0.047 (-0.100, 0.194)  | -0.035 (-0.104, 0.035)   |
| AD Signature x delirium           | -0.033 (-0.380, 0.313)                              | -0.043 (-0.221, 0.134) | 0.088 (-0.062, 0.238)  | -0.053 (-0.123, 0.016)   |
| <b>HVLT Total</b>                 |                                                     |                        |                        |                          |
| AD Signature                      | 0.126 (-0.033, 0.285)                               | -0.034 (-0.155, 0.088) | -0.059 (-0.162, 0.044) | 0.032 (-0.012, 0.076)    |
| Delirium                          | -0.579 (-0.922, -0.235)                             | 0.094 (-0.169, 0.357)  | 0.132 (-0.091, 0.355)  | -0.109 (-0.202, -0.016)  |
| AD Signature x delirium           | -0.105 (-0.455, 0.244)                              | -0.120 (-0.389, 0.149) | 0.012 (-0.216, 0.240)  | -0.099 (-0.192, -0.007)  |
| <b>HVLT Delay</b>                 |                                                     |                        |                        |                          |
| AD Signature                      | 0.118 (-0.050, 0.285)                               | -0.060 (-0.188, 0.067) | 0.052 (-0.056, 0.160)  | -0.027 (-0.077, 0.022)   |
| Delirium                          | -0.473 (-0.835, -0.112)                             | 0.150 (-0.126, 0.427)  | 0.144 (-0.090, 0.378)  | -0.116 (-0.220, -0.011)  |
| AD Signature x delirium           | -0.054 (-0.422, 0.315)                              | -0.113 (-0.395, 0.169) | -0.164 (-0.403, 0.075) | 0.013 (-0.091, 0.118)    |
| <b>Trails B</b>                   |                                                     |                        |                        |                          |
| AD Signature                      | 0.073 (-0.092, 0.237)                               | -0.025 (-0.162, 0.113) | -0.013 (-0.130, 0.103) | 0.067 (0.010, 0.123)     |
| Delirium                          | 0.290 (-0.064, 0.645)                               | 0.143 (-0.154, 0.440)  | -0.136 (-0.388, 0.116) | 0.029 (-0.090, 0.148)    |
| AD Signature x delirium           | 0.016 (-0.345, 0.377)                               | 0.194 (-0.110, 0.497)  | -0.221 (-0.478, 0.036) | 0.032 (-0.087, 0.152)    |
| <b>GCP (Model 1) - Aging Only</b> |                                                     |                        |                        |                          |
| Aging Signature                   | -0.124 (-0.266, 0.018)                              | -0.056 (-0.127, 0.016) | 0.042 (-0.019, 0.103)  | -0.023 (-0.052, 0.006)   |
| <b>GCP (Model 2) - Aging Only</b> |                                                     |                        |                        |                          |
| Aging Signature                   | -0.120 (-0.273, 0.032)                              | -0.053 (-0.132, 0.026) | 0.052 (-0.015, 0.119)  | -0.029 (-0.061, 0.003)   |
| Delirium                          | -0.430 (-0.765, -0.094)                             | -0.043 (-0.217, 0.131) | 0.027 (-0.121, 0.175)  | -0.020 (-0.091, 0.051)   |
| Aging Signature x delirium        | -0.139 (-0.506, 0.228)                              | -0.026 (-0.218, 0.166) | -0.048 (-0.210, 0.115) | 0.028 (-0.050, 0.105)    |

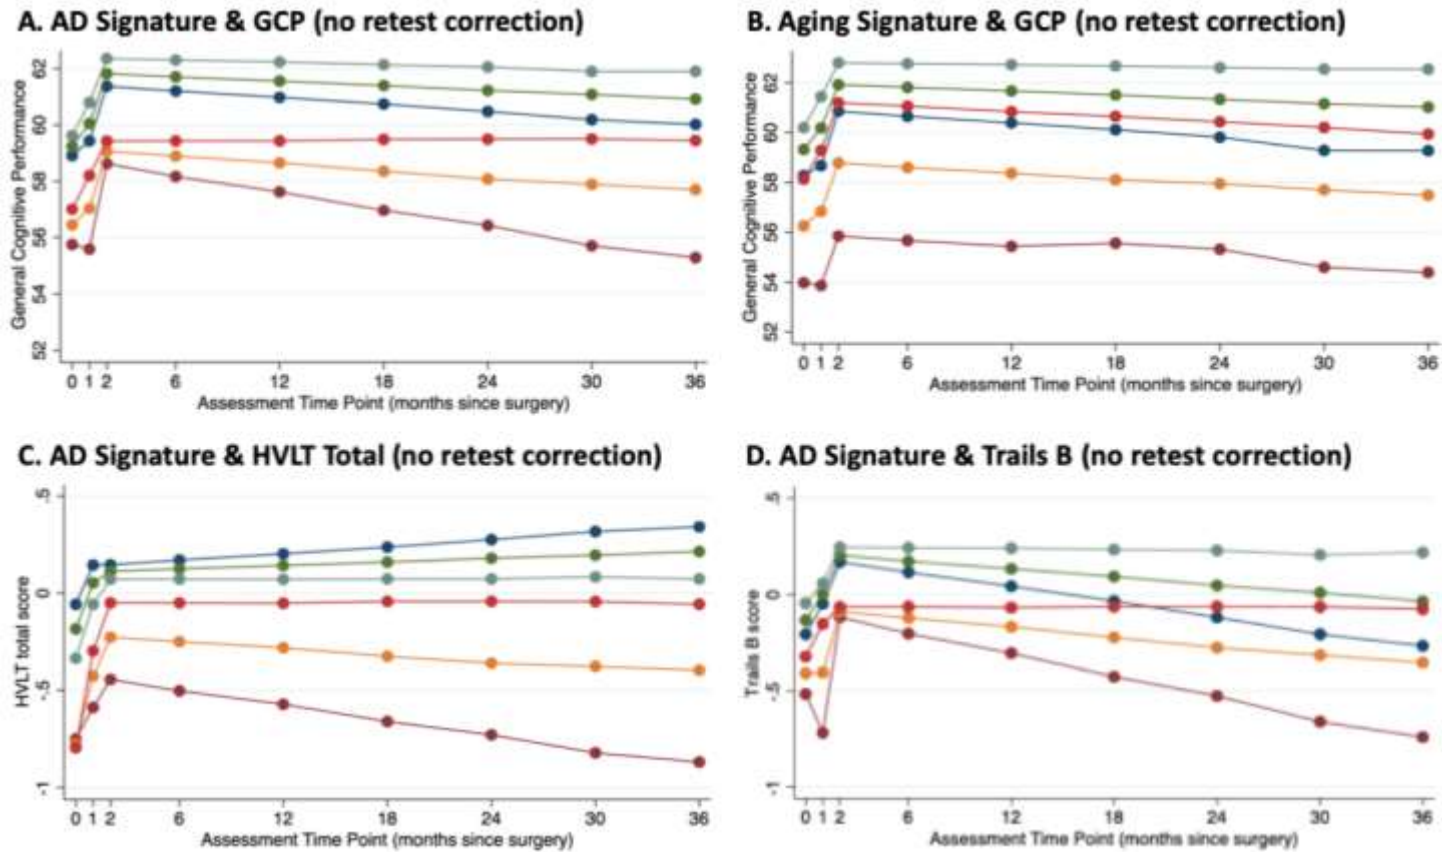

**Supplementary Figure 3. Group effects of cortical atrophy due to AD or aging and post-operative delirium on short- and long-term change in cognitive scores without retest correction.** The cortical signatures were analyzed as continuous variables, but for illustration purposes, results are displayed by groups based on cortical signature tertiles (tertile 1 has the thickest cortex, tertile 3 has the thinnest cortex, interpreted as the greatest atrophy) and delirium (present [+] or absent [-]). Tertiles are generated separately for AD signature and for Aging-Only signature measures, leading to slight differences in group size. Estimated slopes are reported based on model coefficients and average cortical thickness in the respective tertile. (A) AD Signature and GCP [General Cognitive Performance]; (B) Aging Signature and GCP; (C) AD Signature and HVL Total [Hopkins Verbal Learning Test – Revised total score]; (D) AD Signature and Trails B [Trail Making Test B (reverse-scored so that lower numbers indicate worse performance)]. HVL Total and Trails B were transformed into z-scores.

**Supplementary Table 8.** Comparison of baseline (intercept) coefficients with and without additional health measures as covariates

|                            | <b>Baseline Coefficients [Intercept] (95% Confidence Interval)</b> |                                       |
|----------------------------|--------------------------------------------------------------------|---------------------------------------|
|                            | <b>Original covariates</b>                                         | <b>+Additional health covariates*</b> |
| <b>GCP (Model 1)</b>       |                                                                    |                                       |
| AD signature               | -0.035 (-0.179, 0.109)                                             | -0.024 (-0.166, 0.118)                |
| <b>GCP (Model 2)</b>       |                                                                    |                                       |
| AD signature               | -0.044 (-0.202, 0.115)                                             | -0.036 (-0.192, 0.120)                |
| Delirium                   | -0.387 (-0.728, -0.045)                                            | -0.374 (-0.711, -0.038)               |
| AD signature x delirium    | -0.033 (-0.381, 0.314)                                             | -0.013 (-0.357, 0.330)                |
| <b>HVLT Total Learning</b> |                                                                    |                                       |
| AD signature               | 0.127 (-0.033, 0.286)                                              | 0.125 (-0.036, 0.285)                 |
| Delirium                   | -0.582 (-0.927, -0.237)                                            | -0.584 (-0.930, -0.238)               |
| AD signature x delirium    | -0.106 (-0.457, 0.245)                                             | -0.101 (-0.454, 0.253)                |
| <b>HVLT Delayed Recall</b> |                                                                    |                                       |
| AD signature               | 0.118 (-0.050, 0.286)                                              | 0.113 (-0.055, 0.281)                 |
| Delirium                   | -0.475 (-0.838, -0.112)                                            | -0.478 (-0.841, -0.115)               |
| AD signature x delirium    | -0.054 (-0.423, 0.316)                                             | -0.053 (-0.424, 0.317)                |
| <b>Trails B</b>            |                                                                    |                                       |
| AD signature               | -0.079 (-0.244, 0.086)                                             | -0.067 (-0.230, 0.095)                |
| Delirium                   | -0.281 (-0.637, 0.074)                                             | -0.260 (-0.610, 0.090)                |
| AD signature x delirium    | -0.008 (-0.370, 0.354)                                             | -0.002 (-0.359, 0.356)                |

\*Additional baseline health measures covariates: (1) presence/absence of vascular comorbidity [confirmed or history of myocardial infarction, congestive heart failure, peripheral vascular disease, diabetes (with or without end organ damage), cerebrovascular disease (carotid stenosis, history of stroke or transient ischaemic attack), or hemiplegia], (2) Charlson Comorbidity Index (CCI), and (3) the 15-item Geriatric Depression Scale (GDS).
